# A network model of glymphatic flow under different experimentally-motivated parametric scenarios

Jeffrey Tithof<sup>1,2\*</sup>, Kimberly A. S. Boster<sup>1</sup>, Peter A. R. Bork<sup>3</sup>, Maiken Nedergaard<sup>3,4</sup>, John H. Thomas<sup>1</sup>, Douglas H. Kelley<sup>1</sup>

<sup>1</sup>Department of Mechanical Engineering, University of Rochester, Rochester, NY 14627, USA

<sup>2</sup>Department of Mechanical Engineering, University of Minnesota, Minneapolis, MN 55455, USA

<sup>3</sup>Center for Translational Neuromedicine, Faculty of Health and Medical Sciences, University of Copenhagen, 2200 Copenhagen, Denmark

<sup>4</sup>Center for Translational Neuromedicine, Department of Neurosurgery, University of Rochester Medical Center, Rochester, NY 14642, USA

\*To whom correspondence should be addressed; E-mail: [tithof@umn.edu](mailto:tithof@umn.edu).

**Abstract: Rapidly growing evidence demonstrates that flow of cerebrospinal fluid (CSF) through perivascular spaces (PVSs) – annular tunnels surrounding vasculature in the brain – is a critically-important component of neurophysiology. CSF inflow contributes during physiological conditions to clearance of metabolic waste and in pathological situations to edema formation. However, brain-wide imaging methods cannot resolve PVSs, and high-resolution methods cannot access deep tissue or be applied to human subjects, so theoretical models provide essential insight. We model this CSF pathway as a network of hydraulic resistances, built from published parameters. A few parameters have very wide uncertainties, so we focus on the limits of their feasible ranges by analyzing different parametric scenarios. We identify low-resistance PVSs and high-resistance parenchyma (brain tissue) as the scenario that best ex-**

**plains experimental observations. Our results point to the most important parameters that should be measured in future experiments. Extensions of our modeling may help predict stroke severity or lead to neurological disease treatments and drug delivery methods.**

## Introduction

The brain lacks lymph vessels, so scientists have questioned whether a flow of cerebrospinal fluid (CSF) might play a pseudo-lymphatic role in transporting metabolic waste products (1). Early speculation was motivated by studies that found that tracers injected into the CSF were transported at rates faster than is possible by diffusion alone (2, 3). Now, renewed interest has followed the in vivo observations of Iliff et al. (4), who reported bulk flow of CSF through perivascular spaces (PVSs; annular channels around brain vasculature) of the murine brain (4), which aids clearance of amyloid- $\beta$ , a peptide linked to Alzheimer's disease; they named this clearance pathway the "glymphatic" (glial-lymphatic) system. Soon thereafter, Xie et al. (5) demonstrated that this system is active primarily during sleep. There is now compelling evidence that decline in glymphatic transport plays an important role in Alzheimer's disease, dementia, and other neurological disorders (6–8).

The glymphatic pathway is hypothesized to consist of an influx of CSF along periarterial spaces which subsequently exchanges with extracellular fluid via bulk flow, facilitated by aquaporin-4 channels on the astrocyte endfeet lining the outer wall of PVSs, followed by an efflux along perivenous spaces and nerve sheaths (9). Recent studies in humans have confirmed many of the key features of the glymphatic hypothesis (10–12). Several experimental methods have been used to probe various parts of the glymphatic system. Two-photon microscopy offers excellent temporal and spatial resolution for in vivo measurements, but typically

requires invasive surgery to place a cranial window and is limited to regions near the surface of the brain (4, 8, 13, 14). Magnetic resonance imaging provides noninvasive brain-wide measurements, but temporal and spatial resolution are orders of magnitude lower, rendering PVSs smaller than the spatial resolution (10, 11, 15). Although *ex vivo* analysis of brain tissue offers high resolution throughout the brain, recent studies have revealed abnormal CSF flow immediately following cardiac arrest (16, 17) and collapse of PVSs during tissue fixation (14), casting doubt on such measurements. Hence, there remains much uncertainty regarding the precise CSF flow pathway and transport rates. Resolving such details is essential to inform strategies for prevention, diagnosis, and treatment of neurological disorders (7).

Numerical modeling offers a powerful tool in which governing equations and physical constraints can fill voids where experimental measurements are not feasible. Indeed, much insight into the glymphatic system has already resulted from such studies (see the review articles (18–22)). Here we develop numerical models of CSF flow through a substantial portion of the glymphatic system and use this model to make predictions under different scenarios that account for uncertainties in important geometric and material parameters. Since a fully-resolved fluid-dynamic model is not computationally feasible, our approach employs a hydraulic network model, as in prior work (23–26). We investigate whether most CSF flows through the parenchyma or PVSs surrounding precapillaries, which we model as parallel pathways. Our attention to precapillary PVSs is motivated by (i) early experimental evidence of tracer transport through capillary PVSs (3), (ii) recent characterization of molecular markers suggesting PVSs are continuous from arterioles to capillaries to veins (27), and (iii) recent theoretical arguments that diffusive transport in the parenchyma coupled with advective transport in precapillary PVSs might provide an effective clearance mechanism (19).

In order to improve on prior idealizations of the glymphatic pathway (24, 28), we have developed a model of CSF flow in the murine brain based on measurements of the vascular con-

nectivity performed by Blinder et al. (29, 30). We use the connectivity between different vessels in this model (Fig. 1A-C) to separately simulate either blood flow (for validation) or CSF flow. The model includes flow associated with one of the major arteries branching from the Circle of Willis, e.g. the middle cerebral artery (MCA), and thus includes flow in approximately one-fifth of the cortex. The model geometry for the pial vasculature (Fig. 1B) is based on a branching hexagonal model proposed in ref. (29), with six pial generations (amounting to 21 hexagonal units) chosen to match the approximate number of penetrating arterioles in the vicinity of the MCA. From data reported in ref. (30), we determined that, on average, 11 precapillaries branch from each of the penetrating arterioles, which we assumed to be uniformly spaced (Fig. 1C). Our hydraulic network model relates flow to the pressure differences that drive the flow and the hydraulic resistances that oppose the flow (pressure and resistance being analogous to voltage and electrical resistance in circuits). For blood flow (or CSF flow), the resistance through the capillary bed (or capillary PVSs) and venous circulation (or venous PVSs) is modeled using single parallel resistors, shown in gray in Fig. 1C, with resistance  $2.25 \times 10^7$  mmHg·min/ml (or 1 mmHg·min/ml); see Methods and A (B) in SM for details. Parenchymal flow (implemented only for CSF flow) is modeled using hydraulic resistances based on an analytical expression provided in ref. (31) (see C in SM). A full list of the parameters for the model is given in Table 1.

## Results

### Model validation via blood flow simulations

In order to validate that our idealized model of the vascular framework did not significantly alter the distribution of flow, we compared blood flow through our model with blood flow predicted for the realistic network measured by Blinder et al. (30). The idealized network was adjusted to cover an extent of vascular territory similar to that of the Blinder et al. study by matching the

number of penetrating arterioles, resulting in a network with two pial generations (three hexagonal units), in contrast to the network shown in Fig. 1A, which consists of six pial generations or 21 hexagonal units. In ref. (30), the authors measured the location and radius of all of the vessels within a section of the cortex, noting the connectivity between the vessels, and assigned a resistance to each segment based on a modified Hagen-Poiseuille law,

$$R = \frac{32\mu L}{\pi r^4} \left[ 1 - 0.863e^{\frac{-r}{14.3\mu\text{m}}} + 27.5e^{\frac{-r}{0.351\mu\text{m}}} \right], \quad (1)$$

where  $r$  is the vessel radius,  $L$  is the vessel length,  $R$  is the resistance of that segment of vessel, and  $\mu$  is the dynamic viscosity of water. They then applied a constant pressure difference of 50 mmHg between the arterioles and venules at the surface of the cortex and solved for the flow in each vessel. The resulting ranges of pressures, volumetric flow rates, and velocities for one mouse are indicated by the shaded regions shown in Fig. 1D-F (see Fig. S1 for results for two more mice). Based on Eqn. (1) and with a pressure difference of 50 mmHg between the inlet and outlet, we also predicted pressures, volume flow rates, and velocities for the idealized vascular geometry, which are plotted in Fig. 1D-F with solid symbols; the error bars indicate the range of values. The good agreement between the results for the realistic geometry (30) and for the idealized geometry indicates that the idealization does not substantially alter the salient features of blood flow through the network. The smaller range of values observed for the idealized geometry is a result of the homogeneity of the idealization.

### **Dependence of glymphatic flow on permeability and PVS size**

To model CSF flow through the glymphatic network, we enabled parenchymal flow (purple stars in Fig. 1A,C), modeled three different types of PVSs – pial, penetrating, and precapillary – and assumed homogeneity in the shapes, sizes, and porosity of each of these different PVS types (see Methods for a description of how the hydraulic resistance was computed for each

pathway). Several variables needed to model fluid flow through the PVSs and parenchyma are unknown or have substantial uncertainty in their estimates. To overcome this challenge, we performed multiple simulations by bracketing the uncertain quantities (i.e., using the highest and lowest estimates of the uncertain quantities), based on a wide survey of the literature.

Bracketed parameters are indicated in red in Table 1. We considered four scenarios that lead to an overall resistance for the glymphatic network that is either maximal ( $R_{\max}$ ), minimal ( $R_{\min}$ ), or intermediate (Intermediate scenario 1, 2; i.e., a combination of one maximal and one minimal parameter). For all these simulations (unless stated otherwise), we chose an external pressure drop  $\Delta p_{\text{ext}}$  such that the median pial PVS velocity matched experimental measurements of  $18.7 \mu\text{m/s}$  (14, 32, 33). We modeled the pial PVSs as open (i.e., not porous) (34) with a realistic, oblate shape (35) and a PVS-to-artery cross-sectional area ratio of  $\Gamma_{\text{pial}} = 1.4$  (14). For penetrating PVSs, we estimated the area ratio  $\Gamma_{\text{pen}} = 0.7$  from in vivo measurements, which we intend to publish in the future. We modeled flow through the parenchyma, as well as porous penetrating and precapillary PVSs, using Darcy's law; open (non-porous) penetrating PVSs were modeled as a tangent eccentric annulus (35), and open precapillary PVSs were modeled using the analytical expression for flow through a concentric annulus (see C-D in SM).

The four different scenarios we modeled arise from combining either the highest or lowest estimate of (1) the total parenchymal resistance and (2) the penetrating and precapillary PVS permeability, as detailed in Table 2. Minimum/maximum estimates of the total parenchymal resistance were obtained by lumping together the resistance from the gaps between astrocyte endfeet and the extracellular space (ECS; Fig. 2A-B; see Methods and C in SM). Note that prior studies (23, 28, 36) suggest CSF from penetrating PVSs primarily enters the ECS via gaps between astrocyte endfeet. The upper and lower bounds that we set on the parenchymal permeability  $\kappa_{\text{par}}$  come from two commonly cited studies (31, 37); multiple other studies (38–42) have reported  $\kappa_{\text{par}}$  values within these bounds. Bassar (37) performed experimental measurements

that estimated  $\kappa_{\text{par}} = 4.5 \times 10^{-15} \text{ m}^2$ . However, Holter et al. (31) performed a numerical reconstruction of the neuropil, estimating  $\kappa_{\text{par}} = 1.2 \times 10^{-17} \text{ m}^2$ , and speculated that the discrepancy with the earlier findings of Bassar and other experimental studies may be due to fluid escaping to high-permeability pathways such as PVSs in those experiments. We therefore used this hypothesis as the basis for our  $R_{\text{max}}$  scenario, with  $\kappa_{\text{par}} = 1.2 \times 10^{-17} \text{ m}^2$  and  $\kappa_{\text{PVS}} = 4.5 \times 10^{-15} \text{ m}^2$ . For the  $R_{\text{min}}$  scenario, we supposed that measurements of  $\kappa_{\text{par}} = 4.5 \times 10^{-15} \text{ m}^2$  from Bassar (37) accurately quantify the parenchymal permeability. To model flow through penetrating and precapillary PVSs with minimal resistance, we computed an effective permeability  $\kappa_{\text{open}}$  that results from equating the volumetric flow rate predicted by Darcy's law with the analytical expression for the volumetric flow rate for viscous flow through an open concentric circular annulus (see D in SM). This calculation defines a range of valid and invalid permeability values for a given PVS geometry, parameterized by the vessel diameter  $d$  and PVS-to-vessel area ratio  $\Gamma$  (Fig. 2C-E). We set  $\kappa_{\text{PVS}}$  equal to the value of  $\kappa_{\text{open}}$  for each corresponding geometry (penetrating and precapillary PVSs). Intermediate scenarios 1 and 2 come from choosing (1)  $\kappa_{\text{par}} = 1.2 \times 10^{-17} \text{ m}^2$  and  $\kappa_{\text{PVS}} = \kappa_{\text{open}}$  or (2)  $\kappa_{\text{par}} = \kappa_{\text{PVS}} = 4.5 \times 10^{-15} \text{ m}^2$ .

For each of the four scenarios we considered, we varied  $\Gamma_{\text{precap}}$  (Fig. 2A) from 0.07 to 0.36 (i.e., the precapillary PVS gap ranged from 0.1 to 0.5  $\mu\text{m}$ ). These values come from estimates of the size of a basement membrane (43) or the endothelial glycocalyx (44), which are the respective smallest and largest anatomical structures likely to form the contiguous portion of the PVS network at the precapillary level. In general, the anatomical details of which spaces are contiguous with penetrating PVSs are not well-understood; for a more in-depth discussion of potential PVS routes at the level of microvessels, see Hladky and Barrand (45). For the  $R_{\text{min}}$  and Intermediate 2 scenarios (with  $\kappa_{\text{PVS}} = \kappa_{\text{Bassar}} = 4.5 \times 10^{-15} \text{ m}^2$ ), we found that an open precapillary PVS would result in an effective permeability  $\kappa_{\text{open}} < \kappa_{\text{Bassar}}$  for  $\Gamma_{\text{precap}} < 0.16$  (Fig. 2E). By definition,  $\kappa_{\text{open}}$  provides the upper limit on permeability, and since these two

scenarios assume  $\kappa_{\text{Basser}}$  provides the lower limit of PVS permeability, we exclude  $\Gamma_{\text{precap}} < 0.16$  (i.e., precapillary PVS gap widths below  $0.23 \mu\text{m}$ ) from further analysis in these two scenarios.

The external pressure drop  $\Delta p_{\text{ext}}$  required to drive flow through the glymphatic network is plotted in Fig. 2F for all four scenarios. The largest pressure drop (34 mmHg) is required for the  $R_{\text{max}}$  case with  $\Gamma_{\text{precap}} = 0.17$ , while the  $R_{\text{min}}$  case requires a drop of only 0.28 mmHg (which does not vary appreciably with  $\Gamma_{\text{precap}}$ ). The total volumetric flow rate through the entire network (Fig. 2G), which is approximately one-fifth of full cortical glymphatic network, is either 0.043 or 0.044  $\mu\text{l}/\text{min}$  for all cases considered here; this value does not vary because of our requirement that the median flow speed in the pial PVSs match experimental measurements (14). With  $Q_{\text{total}}$  held constant, the total hydraulic resistance of the network (Fig. 2H) is linearly proportional to the external pressure drop, resulting in a similar functional dependence for each scenario.

We next investigated the percentage of flow that passes through the parenchyma versus the precapillary PVSs and the associated flow speed for each case (Fig. 2I-P). We found that when  $\kappa_{\text{par}} = 1.2 \times 10^{-17} \text{ m}^2$  ( $R_{\text{max}}$  and Intermediate 1 scenarios) there is a comparable fraction of total flow through the parenchyma and precapillary PVSs (Fig. 2I,M). However, if  $\kappa_{\text{par}} = 4.5 \times 10^{-15} \text{ m}^2$  ( $R_{\text{min}}$  and Intermediate 2 scenarios), virtually all of the flow passes through the parenchyma with a negligible amount passing through the precapillary PVSs (Fig. 2K,O). Consequently, only the former two cases show a substantial dependence on  $\Gamma_{\text{precap}}$ , with the percentage of flow through precapillary PVSs varying from 19% to 33% as  $\Gamma_{\text{precap}}$  is varied from 0.17 to 0.36 for the  $R_{\text{max}}$  scenario, or from 1.8% to 69% as  $\Gamma_{\text{precap}}$  is varied from 0.07 to 0.36 for Intermediate scenario 1. The average flow speeds are plotted in Fig. 2J, L, N, P, with error bars indicating the full range of the data. The mean values for the flow speed through the parenchyma are quite similar for all four scenarios, with the average speed varying from 0.079  $\mu\text{m}/\text{s}$  to 0.066  $\mu\text{m}/\text{s}$



for the  $R_{\max}$  scenario, or from  $0.096 \mu\text{m/s}$  to  $0.030 \mu\text{m/s}$  for Intermediate scenario 1, as  $\Gamma_{\text{precap}}$  is increased. For the  $R_{\min}$  scenario (Intermediate scenario 2), the mean speed is  $0.10$  ( $0.097$ )  $\mu\text{m/s}$  and does not vary appreciably with  $\Gamma_{\text{precap}}$ . We caution that the plotted parenchymal flow speeds are not mean values across the parenchyma; they are computed at the outer wall of the PVS, so they should be interpreted as upper bounds on the parenchymal flow speed, which varies spatially. The mean precapillary flow speeds, in contrast to parenchymal speeds, show substantial variation throughout the four scenarios. The average speed varies from  $15 \mu\text{m/s}$  to  $13 \mu\text{m/s}$  for the  $R_{\max}$  scenario, or from  $3.7 \mu\text{m/s}$  to  $27 \mu\text{m/s}$  for Intermediate scenario 1, as  $\Gamma_{\text{precap}}$  is increased. For the  $R_{\min}$  scenario, the mean speed varies from  $0.0051$  to  $0.12 \mu\text{m/s}$  as  $\Gamma_{\text{precap}}$  is increased, but for Intermediate scenario 2 the mean speed is  $0.025 \mu\text{m/s}$  and does not vary with  $\Gamma_{\text{precap}}$ . Movies 1-4 provide visualizations of the flow speed, as well as the pressure and volume flow rate, throughout the network for the four scenarios each with maximum or minimum  $\Gamma_{\text{precap}}$ .

### **Quantifying tissue perfusion for different scenarios**

Numerous studies in both humans and mice have reported that tracers injected into CSF penetrate below the brain's surface over relatively short time scales (*10, 12, 15, 46*). Furthermore, there is growing evidence that CSF flow through the glymphatic pathway is important for the removal of metabolic waste (*12, 47, 48*), including amyloid- $\beta$  (*4, 5, 49, 50*), which is produced throughout the brain. Hence, one may reasonably expect a uniform perfusion of CSF throughout the depth of the cortex to explain observations in tracer experiments and the physiological necessity of adequate waste removal. Consequently, we next computed the volume flow rate through pial PVSs, penetrating PVSs, precapillary PVSs, and the parenchyma for each of eight cases (the four scenarios introduced previously, each with either the maximum or minimum value of  $\Gamma_{\text{precap}}$ ), as shown in the left columns of each scenario in Fig. 3. It is immediately clear

that when parenchymal resistance is maximal ( $R_{\max}$  and Intermediate 1 scenarios), a significant volume of CSF penetrates into the deep cortex (Fig. 3A, C, I, K). However, if parenchymal resistance is minimal ( $R_{\min}$  and Intermediate 2 scenarios), the volume flow rate drops off very rapidly with depth (Fig. 3E, G, M, O).

To characterize the perfusion, we plotted the cumulative flow fraction (i.e., the fraction of the total volume flow rate perfused from the surface of the brain to a given depth) in the right columns for each scenario in Fig. 3. The  $R_{\max}$  scenario gives moderately uniform perfusion, with 71% ( $\Gamma_{\text{precap}} = 0.17$ ) to 75% ( $\Gamma_{\text{precap}} = 0.36$ ) of the total CSF exiting each penetrating PVS within 270  $\mu\text{m}$  of the surface. Comparing the flows for small versus large precapillary PVSs (Fig. 3B, D), it is clear that more flow reroutes through the PVSs in the latter case, consistent with Fig. 2I. In contrast, the  $R_{\min}$  and Intermediate 2 scenarios exhibit poor perfusion, with 93% and 100% of the total CSF perfusing within 270  $\mu\text{m}$  of the surface (Fig. 3F, H, N, P; these scenarios also exhibit weak dependence on  $\Gamma_{\text{precap}}$ ). By far the best perfusion is observed in Intermediate scenario 1, for which 28% and 30% of the CSF is perfused within 270  $\mu\text{m}$  of the surface for  $\Gamma_{\text{precap}} = 0.07$  and  $\Gamma_{\text{precap}} = 0.36$ , respectively (Fig. 3J, L; perfectly uniform perfusion corresponds to 27% at 270  $\mu\text{m}$ ). Although the total perfusion remains approximately constant for different precapillary PVS sizes, as  $\Gamma_{\text{precap}}$  is increased a greater fraction of the flow reroutes from the parenchyma to the precapillary PVSs (compare Fig. 3I-J with K-L), consistent with the flow fractions plotted in Fig. 2M.

The variations in perfusion through the depth of the cortex for these different scenarios can be understood by comparing the hydraulic resistance of individual segments of the network, as shown in Fig. 3Q-X; several of these values are also provided in Table S1. When  $R_{\text{pen}}$  is substantially smaller than both  $R_{\text{par}}$  and  $R_{\text{precap}}$  (Intermediate scenario 1; Fig. 3U-V), excellent, uniform perfusion occurs (Fig. 3J,L). However, a lesser separation in resistance values ( $R_{\max}$  scenario; Fig. 3Q-R) leads to less uniformity in the perfusion (Fig. 3B,D). For  $R_{\text{pen}}$

slightly *greater* than  $R_{\text{par}}$  ( $R_{\text{min}}$  scenario; Fig. 3S-T), the uniformity of perfusion is much poorer (Fig. 3F,H). Finally, when  $R_{\text{pen}}$  is much greater than  $R_{\text{par}}$  (Intermediate scenario 2; Fig. 3W-X), virtually all fluid exits through the parenchymal nodes closest to the surface of the brain and perfusion is negligible at deeper nodes (Fig. 3N,P). The relative flow through the parenchyma versus precapillary PVSs can also be understood by comparing  $R_{\text{precap}}$  and  $R_{\text{par}}$ . For cases where there is substantial perfusion, if the value of  $R_{\text{precap}}$  and  $R_{\text{par}}$  are comparable (Fig. 3Q-R, V), then a comparable fraction of fluid will flow through each route (Fig. 3B, D, L), with greater flow through the path of lower resistance. Two additional points are notable. The value of  $R_{\text{pial}}$  is much less than  $R_{\text{pen}}$  in every scenario, which ensures uniform perfusion of CSF across the pial PVS network (i.e., an approximately equal amount of CSF flows through both a distal penetrating PVSs and a proximal one). Also, the uncertainties in the cavity fraction and gap width of the astrocyte endfeet lead to a huge range in possible values of  $R_{\text{AE}}$  (Fig. 3Q-X). In the  $R_{\text{max}}$  and Intermediate 1 scenarios, the astrocyte endfeet provide the dominant barrier to flow entering the parenchyma (Fig. 3Q-R, U-V); however, in the  $R_{\text{min}}$  and Intermediate 2 scenarios (Fig. 3S-T, W-X),  $R_{\text{AE}}$  is very small and hence plays a negligible role in determining CSF flow through the parenchyma.

### **Glymphatic flow during wakefulness versus sleep**

We carried out additional calculations with our model aimed at investigating the increase in tracer influx during sleep/anesthesia reported by several studies (5, 51–53). The CSF simulations presented up to this point (Fig. 2-3) correspond to sleep conditions (or, comparably, conditions under ketamine-xylazine anesthesia). To model the change in flow during wakefulness, we used the Kozeny-Carman equation (see E in SM) to estimate that  $\kappa_{\text{par}}$  decreases by a factor of about 5.5 in wakefulness, compared to sleep. We repeated the simulations of the eight scenarios presented in Fig. 3 using a parenchymal permeability that was 5.5 times smaller,

but all other parameters (including the imposed pressure drop) were left unchanged for each scenario. We then compared these results to the results from each corresponding simulation under sleep conditions. The total volume flow rates through the entire model network for wake and sleep in each of the eight scenarios are plotted in Fig. 4A-H. The combined flow for awake conditions (open gray diamonds) varies, whereas for sleep (filled gray diamonds) all correspond to  $Q_{\text{total}} = 0.043$  (or  $0.044$ )  $\mu\text{l}/\text{min}$ , which is a consequence of matching the median pial PVS velocity to experimental measurements, consistent with Fig. 2G.

We quantified the sleep/wake change in flow by plotting the ratio of volume flow rates  $Q_{\text{total}}^{\text{sleep}}/Q_{\text{total}}^{\text{awake}}$ , shown in Fig. 4I-P. For sleep compared to wakefulness, in every scenario the volume flow rate decreases for precapillary PVSs and increases for the parenchyma, leading to an overall increase in the combined volume flow rate. This is expected since the increased parenchymal permeability during sleep leads to an overall reduction in the hydraulic resistance of the network, and locally this change will reroute some precapillary PVS flow through the parenchyma. We find that the wake/sleep increase in combined volume flow rate is largest for small precapillary PVSs (Fig. 4I, K, M, O); this combined increase is small for Intermediate scenario 2 (1.3%),  $R_{\text{max}}$  (25%), and  $R_{\text{min}}$  (29%), but up to 188% for Intermediate scenario 1. In this latter scenario, however, there is substantial sensitivity to the size of the precapillary PVSs (Fig. 4E-F, M-N), which arises because parenchymal flow dominates the combined transport for the  $\Gamma_{\text{precap}} = 0.07$  case (and is therefore sensitive to wake/sleep changes in  $\kappa_{\text{par}}$ ), whereas precapillary PVS flow dominates the combined transport for the  $\Gamma_{\text{precap}} = 0.36$  case (and is therefore insensitive to wake/sleep changes in  $\kappa_{\text{par}}$ ); this observation is consistent with Fig. 2M. Of all of our wake/sleep simulations, none exhibit an increase in combined flow greater than 188%.

## Discussion

In this study, we have developed a numerical model of a substantial portion of the glymphatic system in the murine brain. This model is based on an idealized vascular geometry inspired by detailed measurements reported by Blinder et al. (29, 30), and we validated our model geometry by demonstrating that it provides a reasonably accurate model for blood flow (Fig. 1). In modeling CSF flow through the glymphatic pathway, we matched median pial CSF velocity to experiments (14), we realistically modeled pial PVSs as open (nonporous) (34) and oblate (35), and we used experimentally measured mean vessel diameters and lengths. To overcome the multiple uncertainties in other parameters, we set reasonable bounds (Table 1) and performed several simulations corresponding to different combinations of the extreme values of the uncertain parameters (Fig. 2). This “bracketing” approach included upper and lower bounds on the hydraulic resistance for penetrating PVSs, precapillary PVSs, and the parenchyma (based on a lumped model of astrocyte endfeet and the parenchymal ECS). Our model assumes CSF passes from penetrating PVSs to either precapillary PVSs or through the parenchymal ECS via a paracellular route through gaps between astrocyte endfeet (22). Ultimately, our goal was to investigate different scenarios to test which parameter regimes are feasible and explain as much experimental data as possible. We focused primarily on quantifying the required pressure drops, flow fraction and speed, cortical perfusion, and sleep/wake changes in volumetric flow rate.

The pressure drops and total volumetric flow rates we computed (Fig. 2F-G) provide novel insights. The two scenarios with high penetrating PVS resistance  $R_{\text{pen}}$  ( $R_{\text{max}}$  and Intermediate scenario 2) require infeasibly large pressure drops between 20 and 34 mmHg. This renders both scenarios unlikely because such a large pressure drop is comparable or even greater than the typical systolic-diastolic variation in blood pressure of about 20 mmHg (54), which is thought to provide an absolute upper bound for the pressure drop driving glymphatic flow (24). The  $R_{\text{min}}$

scenario, however, requires the lowest pressure by definition, which is only 0.28 mmHg. Such a pressure is feasible and in line with estimates for the transmante pressure difference (55) (i.e., that between the subarachnoid space and lateral ventricles); note however that ref. (55) is a model of human anatomy. For Intermediate scenario 1, the required pressure is moderately larger, varying from 1.8 to 4.7 mmHg for  $\Gamma_{\text{precap}}$  from 0.36 to 0.07, respectively. Such pressure is plausible, but would perhaps require driving mechanism(s) beyond simply a transmante pressure difference (additional mechanisms are discussed further below).

Since we matched the median pial CSF velocity to experimental measurements (14), we find  $Q_{\text{total}} = 0.043$  (or 0.044)  $\mu\text{l}/\text{min}$  for every scenario (Fig. 2G). Our model represents approximately one-fifth of the cortical glymphatic network (e.g., in the vicinity of one MCA), so the total CSF volume flow rate through cortical PVSs would be approximately 0.22  $\mu\text{l}/\text{min}$ , much larger than the CSF production rate of the choroid plexus, which has recently been measured to be about 0.1  $\mu\text{l}/\text{min}$  for young, healthy, anesthetized mice (56). Although this measurement involves invasive techniques, Karimy et al. (57) (who developed the technique used in (56) in rats) reported that results were consistent with a prior method; still, this measurement may be an underestimate, as the approach excludes CSF production at the 4th ventricle.

Multiple potential explanations exist for the discrepancy between estimates of CSF production and the larger volume flow rate from our model, some of which depend on the details of pial PVSs. The pial PVSs that we have modeled are extensions of the subarachnoid space (SAS), and prior studies have suggested that not all fluid in pial PVSs continues to penetrating PVSs but rather a portion of the flow continues directly from PVSs of pial arteries to those of veins (16, 32, 58). Indeed, Lee et al. (59) delivered a tracer to the cisterna magna in rats and determined that approximately 20% reached the parenchyma, with the rest following CSF efflux routes, including the arachnoid villi, cribriform plate, and cranial and spinal nerves. Hence, it is likely that only a fraction of the total CSF enters pial PVSs, and a fraction of that CSF con-

tinues through penetrating PVSs and into the parenchyma. Our prediction of a volume flow rate *larger* than CSF production thus suggests that either (i) published *in vivo* measurements of fluid velocities (14, 32) are inaccurately large, (ii) the pial geometry in our model is too idealized and greatly overestimates the volume flow rate, (iii) published measurements of CSF production rates are inaccurately small, and/or (iv) the fraction of CSF in pial PVSs which does not enter penetrating PVSs is able to flow back into the SAS and reenter pial PVSs of arteries, forming a kind of recirculation along the surface of the brain.

The values of hydraulic resistance computed with our model can be directly compared to those of prior work. Faghieh and Sharp (24) developed a network model of flow through periarterial spaces and computed a total network resistance of 1.14 mmHg·min/ml. This value is about 5500 times lower than the lowest hydraulic resistance we compute,  $R = 6300$  mmHg·min/ml for the  $R_{\min}$  scenario. This discrepancy is in part because Faghieh and Sharp modeled glymphatic flow in a human, with far more parallel channels than we have considered; other contributing factors include our inclusion of the parenchyma and our use of smaller PVS size for penetrating PVSs. Vinje et al. (26) developed a compartmental model to estimate how elevated intracranial pressure may affect CSF outflow pathways. Although their study modeled human anatomy, they used parameters similar to Intermediate scenario 1 in this study and reported that the hydraulic resistance of the parenchyma was comparable to that of the PVSs, which is in good agreement with our observations.

We find that a substantial fraction of the CSF flowing through penetrating PVSs continues through the parenchyma in every scenario, with values ranging from 31% (Intermediate scenario 1 with  $\Gamma_{\text{precap}} = 0.36$ ; Fig. 2M) to 100% ( $R_{\min}$  and Intermediate 2 scenarios; Fig. 2K,O). In fact, a greater portion of CSF flows through the parenchyma than precapillary PVSs in every scenario except Intermediate scenario 1 with large precapillary PVSs ( $\Gamma_{\text{precap}} \geq 0.26$ ). For the  $R_{\max}$  and Intermediate 1 scenarios,  $\kappa_{\text{par}} \ll \kappa_{\text{PVS}}$  but in the penetrating PVSs the parenchymal-

to-precapillary PVS surface area ratio is large ( $\sim 270$ ), leading to comparable hydraulic resistance for these two parallel pathways (Fig. 3Q-R, V). The mean parenchymal flow speeds we find are surprisingly robust across different scenarios, with values ranging from 0.030 to 0.099  $\mu\text{m/s}$  depending on the scenario and value of  $\Gamma_{\text{precap}}$  (Fig. 2J, L, N, P). Our upper bound is in agreement with the lower bound of flow speeds, 0.083  $\mu\text{m/s}$ , reported by Ray et al. (60). Additionally, our lower bound is in agreement with results from Holter et al. (31), in which parenchymal flow speed near the outer wall of the PVS is about 0.035  $\mu\text{m/s}$  (see Fig. 3 in ref. (31)). For cases in which the precapillary PVS flow fraction is non-negligible ( $> 0.5\%$ ;  $R_{\text{max}}$  and Intermediate 1 scenarios), the speeds are also fairly robust, ranging from 3.7 to 27  $\mu\text{m/s}$  (Fig. 2J, N). This moderate insensitivity to precapillary PVS size ( $\Gamma_{\text{precap}}$ ) – especially for the  $R_{\text{max}}$  scenario – can be understood as follows: as the cross-sectional area  $A_{\text{PVS}}$  increases, the hydraulic resistance  $R_{\text{precap}}$  decreases causing the volume flow rate  $Q$  to increase, rendering the flow speed ( $= Q/A_{\text{PVS}}$ ) approximately constant. To the best of our knowledge, this is the first time precapillary PVS flow speed has been predicted.

We assessed whether each scenario exhibits uniformity in cortical perfusion, which we expect based on reports of tracer penetration below the brain's surface (10, 12, 15, 46) and evidence that flow is important for metabolic waste removal (4, 5, 12, 47–50). Our simulations revealed near-perfect cortical perfusion for Intermediate scenario 1, moderately uniform perfusion for the  $R_{\text{max}}$  scenario, poor perfusion for the  $R_{\text{min}}$  scenario, and negligible perfusion below the brain surface for Intermediate scenario 2 (Fig. 3). As discussed above, good uniformity in perfusion can be understood as a consequence of scale separation in the hydraulic resistance of the three sequential CSF routes: pial PVSs, penetrating PVSs, and parenchyma/precapillary PVSs (Fig. 3Q-X). Poor perfusion occurs if these resistances are comparable (Fig. 3S-T) or do not increase in the aforementioned order (Fig. 3W-X). This observation provides an argument in favor of large parenchymal resistance, which could arise due to tight astrocyte endfeet gaps, a



low-permeability parenchymal ECS, or a combination of the two. Furthermore, the separation in scale between pial and penetrating PVS resistance ensures that CSF is uniformly perfused from the pial PVSs to the penetrating PVSs. This need for separation in scale may explain why pial PVSs have an oblate shape that minimizes their hydraulic resistance (35).

We performed simulations aimed at capturing the increase in CSF flow during sleep compared to wakefulness (5, 51). Multiple studies demonstrate that glymphatic transport is enhanced under ketamine/xylazine (K/X) anesthesia, resembling natural sleep, and inhibited under isoflurane, resembling wakefulness (5, 51, 52, 61); indeed, both the prevalence of slow (delta) waves and the ECS porosity under K/X are comparable to natural sleep (5). These studies comparing K/X and isoflurane highlight the heterogeneity of tracer transport in different regions of the brain, often with two- to four-fold greater tracer influx under K/X, compared to isoflurane. We found that  $R_{\min}$ ,  $R_{\max}$ , and Intermediate scenario 2 all exhibit less than a 30% increase in combined volume flow rate during sleep compared to wakefulness (Fig. 4I-L, O-P); however, we found a 2.9-fold increase in combined volume flow rate for Intermediate scenario 1 with small precapillary PVSs (Fig. 4M). Increased tracer transport can be estimated from increased CSF flow based on the theory of Taylor dispersion (62, 63), which describes the effective diffusion coefficient  $D_{\text{eff}}$  characterizing the rate at which a tracer spreads in a shear flow due to the combined effect of advection and diffusion. For measured pial PVS size and flow speed (14) and a diffusion coefficient of  $D = 1 \times 10^{-11} \text{ m}^2/\text{s}$  (64),  $D_{\text{eff}}/D = 3.8$  (Fig. S2A), suggesting pial CSF flow enhances transport 3.8-fold greater than diffusion alone. When the awake-to-sleep volume flow rate is increased less than 30% ( $R_{\min}$ ,  $R_{\max}$ , and Intermediate scenario 2), the enhanced tracer transport is less than  $D_{\text{eff}}^{\text{sleep}}/D_{\text{eff}}^{\text{awake}} = 43\%$ , whereas a 2.9-fold increase in awake-to-sleep volume flow rate (Intermediate scenario 1 with  $\Gamma_{\text{precap}} = 0.07$ ) leads to  $D_{\text{eff}}^{\text{sleep}}/D_{\text{eff}}^{\text{awake}} = 290\%$  (Fig. S2B). Note that prior studies computed enhancement factors based on oscillatory (zero mean) flow (64, 65), whereas our calculations are based on steady (nonzero mean) flow, which

we have previously argued is more effective for dispersive transport (19, 63). Although Taylor dispersion in pial PVSs is unlikely to account for the entirety of tracer transport observed in experiments, these estimates generally suggest that Intermediate scenario 1 with small precapillary PVSs ( $\Gamma_{\text{precap}} = 0.07$ ) is the only scenario with sleep/awake variations in volume flow rate large enough to explain tracer transport reported in several experiments (5, 51, 52, 61).

Overall, we find that parameters in the general range of Intermediate scenario 1 will satisfy the majority of experimental observations described in this article. We have found that a network with low PVS resistance (high PVS permeability) and high parenchymal resistance (whether from tight gaps between astrocyte endfeet, low parenchymal permeability, or both) requires a reasonably low pressure drop of a few mmHg (Fig. 2F), exhibits nearly perfect cortical perfusion (Fig. 3J, L), and – for small precapillary PVSs – most closely captures the observed increase in CSF influx during sleep compared to wakefulness (Fig. 4M). Additionally, Intermediate scenario 1 with  $\Gamma_{\text{precap}} \approx 0.26$  is the only case which exhibits an equal 50/50 flow through precapillary PVSs and parenchyma. It is enticing to speculate that such a parameter regime may enable dynamic regulation of CSF transport; in this scenario, if parenchymal resistance were dominated by astrocyte endfeet, small changes in the endfoot gap could substantially shift CSF perfusion between slower parenchymal flow and faster precapillary PVSs flow. We caution that the parameter space is large, so Intermediate scenario 1 does not provide the only possible case that satisfies the aforementioned criteria, but rather points to a general parametric regime.

There are numerous limitations in this study that are noteworthy. Perhaps the most consequential limitation is the uncertainty in several parameters that affect CSF transport through the glymphatic pathway, which we attempted to address by considering different limiting parametric scenarios. We restricted ourselves to a moderate number of cases for the sake of clarity, and we did so by lumping some parameters together, such as the astrocyte endfoot geometry and parenchymal permeability (Table 1). Future experimental studies aimed at refining uncertain

parameters will be of tremendous value for constructing predictive models. In particular, the hydraulic resistance of gaps between astrocyte endfeet is especially uncertain, with our estimates here ranging over almost seven orders of magnitude. The low end of this range suggests the astrocyte endfeet play no role in limiting CSF transport from the penetrating PVS to the parenchymal ECS (Fig. 3S-T, W-X), while the upper limit has hydraulic resistance comparable to that of the parenchymal ECS (Fig. 3Q-R, U-V), suggesting the astrocyte endfeet play a critical role. Indeed, a recent study (28) reported heterogeneity in the size of astrocyte endfeet, with larger endfeet (fewer gaps) surrounding larger vessels, which provides a mechanism that improves the uniformity of cortical perfusion. We intend to implement this feature in future simulations. In our model, CSF flow is driven by the simplest possible mechanism – an externally applied pressure drop across the entire network. However, other potential driving mechanisms (e.g., pressure gradients generated by arterial pulsations (14), functional hyperemia (66), or osmotic effects (22, 51, 67)) could be tested with this network model approach by implementing pressure sources (i.e., “batteries”) throughout the network. In particular, incorporation of osmotic effects could be leveraged to investigate the mechanisms by which aquaporin-4 facilitates glymphatic flow (4, 23, 53, 68), although there is some debate about this point (68, 69). Yet another important limitation to our approach, already touched on in the third paragraph of the Discussion, involves the connectivity of pial PVSs at the surface of the brain. By introducing “short-circuit” connections between PVSs of pial arteries and pial veins, our model could be adapted to estimate the fraction of CSF that continues along the surface of the brain versus the fraction that continues through deeper PVSs and the parenchyma. Such a model would greatly benefit from experimental estimates of how many such connections typically exist. Finally, we highlight that our model can be generalized to predict transport of dye, metabolic waste, drugs, or any other molecules due to advection-diffusion. Such future studies will contribute to the substantial ongoing debate regarding the nature of transport in penetrating PVSs (63–66).

In future work, we intend to implement numerous refinements to our simulation, but many will likely offer improvements that are of secondary importance compared to obtaining better estimates of critical parameters (as discussed above). The idealized geometry we have adopted has a regular, repeating structure composed of four different types of homogeneous channels and consequently lacks the high spatial variability characteristic of the true network. Future models could use randomly sampled statistical distributions to assign geometric parameters (29, 30) or directly implement the geometry of a synthetic (70) or real (8, 71) vascular network. We restricted our model to the arterial side of the network while relying on assumptions about PVSs at the capillary and venous level to enable lumped modeling, but future studies could include substantially greater detail.

In this study, we predicted CSF transport throughout a mouse brain, but our network could be expanded to model a human brain by adding more vascular generations. Such an approach would be more challenging because of the fewer measurements available for constraining the parameter space in humans, compared to mice. However, many parameters may be conserved across species (e.g., porosity, PVS area ratios, endfoot gap size). Development of such a model has tremendous clinical value, as it could offer insight into a myriad of neurological disorders. Conditions such as Alzheimer's disease, traumatic brain injury, and subarachnoid hemorrhage are all known to coincide with disrupted glymphatic transport (7).

## **Materials and Methods**

The network depicted in Fig. 1A was inspired by a model proposed by Blinder et al. (29). We used Matlab to develop the geometry, graphical representation, and computational modeling. First the spatial coordinates (for generating the schematic shown in Fig. 1A), geometry, and connectivity of the network were generated and stored. This included vessel lengths, diameters, and types (pial, penetrating, precapillary, or parenchyma). The pressures and volume flow rates

throughout the network were computed using the hydraulic analog of Kirchoff's current law, which states that  $\sum Q = 0$  for each node in the network, where  $Q$  is the volumetric flow rate. This statement is equivalent to the continuity equation, and represents the intuitive requirement that the total influx into any node must match the total efflux from that node. Enforcing this requirement at every node in the network results in a linear algebra problem  $CP = z$  of the form:

$$\left[ \begin{array}{ccc|c} c_{1,2} & -c_{1,2} & \cdots & 1 \\ -c_{1,2} & & & 0 \\ \vdots & & \ddots & \vdots \\ & & & 0 \\ \hline 1 & 0 & \cdots & 0 \end{array} \right] \begin{bmatrix} p_1 \\ p_2 \\ \vdots \\ p_{n-1} \\ p_n \\ Q_{\text{total}} \end{bmatrix} = \begin{bmatrix} 0 \\ 0 \\ \vdots \\ 0 \\ 0 \\ \Delta p_{\text{ext}} \end{bmatrix}$$

where  $c_{i,j}$  are conductance values for the vessel connecting node  $i$  and  $j$ . Overall, the matrix  $C$  is sparse and was constructed by looping over each vessel segment connecting two nodes in the network and updating  $C$  with corresponding conductance values according to the connectivity of the network. Individual conductance values were computed as follows: for blood flow, Eqn. (1) was used along with a lumped model of the capillary and venous flow (see A in SM); for CSF flow, we used power laws (35) for nonporous pial and penetrating PVSs, the analytical solution for flow through a concentric circular annulus for nonporous precapillary PVSs (Eqn. (5) in SM), Darcy's law for porous penetrating and precapillary PVSs, a lumped model for efflux routes (see B in SM), and another lumped model for parenchymal flow (see C in SM). The efflux node was grounded (as indicated in Fig. 1B-C) by setting the  $n^{\text{th}}$  column of  $C$  to all zeroes. The vector  $P$  was obtained by computing the reduced row echelon form of  $[C|z]$ .

Volumetric flow rates through each channel connected by nodes  $i$  and  $j$  were computed as  $Q_{i,j} = c_{i,j}(p_i - p_j)$  and the corresponding average flow speed was computed as  $Q_{i,j}/A_{i,j}$  where  $A_{i,j}$  is the cross-sectional area of the given vessel or PVS (for parenchymal flow speeds,  $A_{i,j}$  corresponds to the surface area of the outer wall of the penetrating PVS). To determine the

external pressure drop  $\Delta p_{\text{ext}}$ , for a given scenario, that results in a median pial CSF flow speed of  $18.7 \mu\text{m/s}$  (14), we solved a root-finding problem using the Matlab function “fzero.” We computed the zero of the function  $f(\Delta p_{\text{ext}}) = v_{\text{exp}} - v_{\text{model}}(\Delta p_{\text{ext}})$ , where  $v_{\text{exp}} = 18.7 \mu\text{m/s}$  and  $v_{\text{model}}(\Delta p_{\text{ext}})$  is the median pial PVS flow speed obtained from the model, driven by an external pressure drop of  $\Delta p_{\text{ext}}$ . Determining  $\Delta p_{\text{ext}}$ , to an accuracy of four digits, that solved the root-finding problem typically required four iterations.

Flow fractions (Fig. 2) were computed by first summing the total volumetric flow rate for either all parenchyma or all precapillary PVSs, then dividing by  $Q_{\text{total}}$ . Cumulative flow fractions at different cortical depths (Fig. 3) were computed by summing a given volumetric flow rate (parenchyma, precapillary, or combined) for all locations at or above a given depth, then dividing by  $Q_{\text{total}}$ . Details are provided in section E of SM describing how the change in parenchymal permeability was modeled for wakefulness relative to sleep. Total volumetric flow rates during wakefulness or sleep (Fig. 4A-H) were computed in a given scenario by summing the volumetric flow rates over the entire network for a given route (parenchyma, precapillary PVSs, or both), and each corresponding sleep/wake ratio (Fig. 4I-P) was then computed.

In addition to the validation provided by the blood flow simulations (Fig. 1D-F), we also verified our numerical methods by testing the rotational symmetry of the network. By implementing a total of three inlets (which is non-physiological), the network exhibits a  $120^\circ$  rotational symmetry (Fig. S3). We computed the relative error for each node by computing the relative error in pressure  $|p_i - p'_i|/p_i$ , where  $i$  is the node index and the prime indicates the  $120^\circ$ -rotated network. This calculation showed that the largest deviation from rotational symmetry is  $4.3 \times 10^{-9}\%$ . We also verified the volumetric flow rate through each pial offshoot (i.e., the pial bifurcation leading to a penetrating PVS) by comparing  $\Delta p_{\text{offshoot}}/Q_{\text{offshoot}}$  to the equivalent lumped resistance for each offshoot, computed analytically. Here,  $\Delta p_{\text{offshoot}}$  is the pressure drop between the start of each offshoot and ground and  $Q_{\text{offshoot}}$  is the total volumetric flow rate

through a given offshoot. We find agreement in all cases to within  $5.6 \times 10^{-5}\%$ .

## References

1. T. H. Milhorat. The third circulation revisited. *J. Neurosurg.*, 42(6):628–645, 1975.
2. H. F. Cserr, D. N. Cooper, P. K. Suri, and C. S. Patlak. Efflux of radiolabeled polyethylene glycols and albumin from rat brain. *Am. J. Physiol.–Renal*, 240(4):F319–F328, 1981.
3. M. L. Rennels, T. F. Gregory, O. R. Blaumanis, K. Fujimoto, and P. A. Grady. Evidence for a ‘paravascular’ fluid circulation in the mammalian central nervous system, provided by the rapid distribution of tracer protein throughout the brain from the subarachnoid space. *Brain Res.*, 326(1):47–63, 1985.
4. J. J. Iliff et al. A paravascular pathway facilitates CSF flow through the brain parenchyma and the clearance of interstitial solutes, including amyloid  $\beta$ . *Sci. Transl. Med.*, 4(147):147ra111, 2012.
5. L. Xie et al. Sleep drives metabolite clearance from the adult brain. *Science*, 342(6156):373–377, 2013.
6. M. Nedergaard and S. A. Goldman. Glymphatic failure as a final common pathway to dementia. *Science*, 370(6512):50–56, 2020.
7. M. K. Rasmussen et al. The glymphatic pathway in neurological disorders. *Lancet Neurol.*, 17(11):1016–1024, 2018.
8. H. Mestre, T. Du, A. M. Sweeney, G. Liu, A. J. Samson, W. Peng, et al. Cerebrospinal fluid influx drives acute ischemic tissue swelling. *Science*, 367(6483), 2020.

9. B. A. Plog and M. Nedergaard. The glymphatic system in central nervous system health and disease: past, present, and future. *Annu Rev Pathol-Mech*, 13:379–394, 2018.
10. G. Ringstad, L. M. Valnes, A. M. Dale, A. H. Pripp, S.-A. S. Vatnehol, K. E. Emblem, K.-A. Mardal, and P. K. Eide. Brain-wide glymphatic enhancement and clearance in humans assessed with MRI. *JCI Insight*, 3(13), 2018.
11. N. E. Fultz et al. Coupled electrophysiological, hemodynamic, and cerebrospinal fluid oscillations in human sleep. *Science*, 366(6465):628–631, 2019.
12. P. K. Eide, V. Vinje, A. H. Pripp, K.-A. Mardal, and G. Ringstad. Sleep deprivation impairs molecular clearance from the human brain. *Brain*, 144(3):863–874, 2021.
13. A. J Schain et al. Cortical spreading depression closes the paravascular space and impairs glymphatic flow: Implications for migraine headache. *J. Neurosci.*, 2017.
14. H. Mestre, J. Tithof, T. Du, W. Song, W. Peng, A.M. Sweeney, G. Olveda, J. H. Thomas, M. Nedergaard, and D. H. Kelley. Flow of cerebrospinal fluid is driven by arterial pulsations and is reduced in hypertension. *Nat. Commun.*, 9(1):4878, 2018.
15. T. Taoka and S. Naganawa. Glymphatic imaging using MRI. *J. Magn. Reson. Imaging*, 51(1):11–24, 2020.
16. Q. Ma, M. Ries, Y. Decker, A. Müller, C. Riner, A. Bücker, et al. Rapid lymphatic efflux limits cerebrospinal fluid flow to the brain. *Acta Neuropathol.*, 137(1):151–165, 2019.
17. T. Du, H. Mestre, B. T. Kress, G. Liu, A. M. Sweeney, A. J. Samson, et al. Cerebrospinal fluid is a significant fluid source for anoxic cerebral edema. *To appear in Brain*, 2021.
18. L. A. Ray and J. J. Heys. Fluid flow and mass transport in brain tissue. *Fluids*, 4(4):196, 2019.



19. J. H. Thomas. Fluid dynamics of cerebrospinal fluid flow in perivascular spaces. *J. R. Soc. Interface*, 16(1):52–57, April 2019.
20. H. Benveniste, X. Liu, S. Koundal, S. Sanggaard, H. Lee, and J. Wardlaw. The glymphatic system and waste clearance with brain aging: a review. *Gerontology*, 65(2):106–119, 2019.
21. A. D. Martinac and L. E. Bilston. Computational modelling of fluid and solute transport in the brain. *Biomech. Model. Mechan.*, 19(3):781–800, 2020.
22. M. K. Rasmussen, H. Mestre, and M. Nedergaard. Fluid transport in the brain. *Physiol. Rev.*, 2021.
23. M. Asgari, D. De Zélicourt, and V. Kurtcuoglu. How astrocyte networks may contribute to cerebral metabolite clearance. *Sci. Rep.*, 5(1):1–13, 2015.
24. M. M. Faghih and M. K. Sharp. Is bulk flow plausible in perivascular, paravascular and paravenous channels? *Fluids Barriers CNS*, 15(1):17, 2018.
25. J. Rey and M. Sarntinoranont. Pulsatile flow drivers in brain parenchyma and perivascular spaces: a resistance network model study. *Fluids Barriers CNS*, 15(1):20, 2018.
26. V. Vinje, A. Eklund, K.-A. Mardal, M. E. Rognes, and K.-H. Støverud. Intracranial pressure elevation alters CSF clearance pathways. *Fluids Barriers CNS*, 17(1):1–19, 2020.
27. M. J. Hannocks, M. E. Pizzo, J. Huppert, T. Deshpande, N. J. Abbott, R. G. Thorne, and L. Sorokin. Molecular characterization of perivascular drainage pathways in the murine brain. *J. Cerebr. Blood F. Met.*, 38(4):669–686, 2018.
28. M. X. Wang, L. Ray, K. F. Tanaka, J. J. Iliff, and J. Heys. Varying perivascular astroglial endfoot dimensions along the vascular tree maintain perivascular-interstitial flux through the cortical mantle. *Glia*, 69(3):715–728, 2021.

29. P. Blinder, A. Y. Shih, C. Rafie, and David Kleinfeld. Topological basis for the robust distribution of blood to rodent neocortex. *Proc. Nat. Acad. Sci.*, 107(28):12670–12675, 2010.
30. P. Blinder, P. S. Tsai, J. P. Kaufhold, P. M. Knutsen, H. Suhl, and D. Kleinfeld. The cortical angiome: an interconnected vascular network with noncolumnar patterns of blood flow. *Nat. Neurosci.*, 16(7):889, 2013.
31. K. E. Holter, B. Kehlet, A. Devor, T. J. Sejnowski, A. M. Dale, S. W. Omholt, O. P. Ottersen, E. A. Nagelhus, K.-A. Mardal, and K. H. Pettersen. Interstitial solute transport in 3D reconstructed neuropil occurs by diffusion rather than bulk flow. *Proc. Nat. Acad. Sci.*, 114(37):9894–9899, 2017.
32. B. Bedussi, M. Almasian, J. de Vos, E. VanBavel, and E. N. T. P. Bakker. Paravascular spaces at the brain surface: Low resistance pathways for cerebrospinal fluid flow. *J. Cerebr. Blood F. Met.*, pages 0271678X1773798–8, 2017.
33. A. Raghunandan, A. Ladron-de Guevara, J. Tithof, H. Mestre, T. Du, M. Nedergaard, J. H. Thomas, and D. H. Kelley. Bulk flow of cerebrospinal fluid observed in periarterial spaces is not an artifact of injection. *eLife*, 10:e65958, 2021.
34. F. Min-Rivas, J. Liu, B. C. Martell, T. Du, H. Mestre, M. Nedergaard, J. Tithof, J. H. Thomas, and D. H. Kelley. Surface periarterial spaces in the mouse brain are open, not porous.
35. J. Tithof, D. H. Kelley, H. Mestre, M. Nedergaard, and J. H. Thomas. Hydraulic resistance of periarterial spaces in the brain. *Fluids Barriers CNS*, 16(19), 2019.
36. B. J. Jin et al. Spatial model of convective solute transport in brain extracellular space does not support a “glymphatic” mechanism. *Gen. Physiol.*, 148(6):489–501, 2016.

37. P. J. Basser. Interstitial pressure, volume, and flow during infusion into brain tissue. *Microvasc. Res.*, 44(2):143–165, 1992.
38. P. F. Morrison, D. W. Laske, H. Bobo, E. H. Oldfield, and R. L. Dedrick. High-flow microinfusion: tissue penetration and pharmacodynamics. *Am. J. Physiol. – Reg. I.*, 266(1):R292–R305, 1994.
39. S. S. Prabhu, W. C. Broaddus, G. T. Gillies, W. G. Loudon, Z.-J. Chen, and B. Smith. Distribution of macromolecular dyes in brain using positive pressure infusion: a model for direct controlled delivery of therapeutic agents. *Surg. Neurol.*, 50(4):367–375, 1998.
40. R. H. Bobo, D. W. Laske, A. Akbasak, P. F. Morrison, R. L. Dedrick, and E. H. Oldfield. Convection-enhanced delivery of macromolecules in the brain. *Proc. Natl. Acad. Sci.*, 91(6):2076–2080, 1994.
41. K. B. Neeves, C. T. Lo, C. P. Foley, W. M. Saltzman, and W. L. Olbricht. Fabrication and characterization of microfluidic probes for convection enhanced drug delivery. *J. Control. Release*, 111(3):252–262, 2006.
42. J. H. Smith and J. A. C. Humphrey. Interstitial transport and transvascular fluid exchange during infusion into brain and tumor tissue. *Microvasc. Res.*, 73(1):58–73, 2007.
43. P. D. Yurchenco. Basement membranes: cell scaffoldings and signaling platforms. *CSH Perspect. Biol.*, 3(2):a004911, 2011.
44. S. Reitsma, D. W. Slaaf, H. Vink, M. A. M. J. Van Zandvoort, and M. G. A. oude Egbrink. The endothelial glycocalyx: composition, functions, and visualization. *Pflüg. Arch. Eur. J. Phy.*, 454(3):345–359, 2007.

45. S. B. Hladky and M. A. Barrand. Elimination of substances from the brain parenchyma: efflux via perivascular pathways and via the blood–brain barrier. *Fluids Barriers CNS*, 15(1):30, 2018.
46. T. Gaberel, C. Gakuba, R. Goulay, S. M. De Lizarrondo, J.-L. Hanouz, E. Emery, E. Touze, D. Vivien, and M. Gauberti. Impaired glymphatic perfusion after strokes revealed by contrast-enhanced mri: a new target for fibrinolysis? *Stroke*, 45(10):3092–3096, 2014.
47. S. Koundal, R. Elkin, S. Nadeem, Y. Xue, S. Constantinou, S. Sanggaard, et al. Optimal mass transport with Lagrangian workflow reveals advective and diffusion driven solute transport in the glymphatic system. *Sci. Rep.*, 10(1):1–18, 2020.
48. X. Gu, Q. Song, Q. Zhang, M. Huang, M. Zheng, J. Chen, D. Wei, J. Chen, X. Wei, H. Chen, et al. Clearance of two organic nanoparticles from the brain via the paravascular pathway. *J. Control. Release*, 322:31–41, 2020.
49. K. F. Roberts, D. L. Elbert, T. P. Kasten, B. W. Patterson, W. C. Sigurdson, R. E. Connors, et al. Amyloid- $\beta$  efflux from the central nervous system into the plasma. *Ann. Neurol.*, 76(6):837–844, 2014.
50. E. Shokri-Kojori, G.-J. Wang, C. E. Wiers, S. B. Demiral, M. Guo, S. W. Kim, E. Lindgren, V. Ramirez, A. Zehra, C. Freeman, et al.  $\beta$ -amyloid accumulation in the human brain after one night of sleep deprivation. *Proc. Natl. Acad. Sci.*, 115(17):4483–4488, 2018.
51. B. A. Plog, H. Mestre, G. E. Olveda, A. M. Sweeney, H. M. Kenney, A. Cove, K. Y. Dholakia, J. Tithof, T. D. Nevins, I. Lundgaard, et al. Transcranial optical imaging reveals a pathway for optimizing the delivery of immunotherapeutics to the brain. *JCI insight*, 3(20), 2018.

52. L. M. Hablitz, H. S. Vinitsky, Q. Sun, F. F. Stæger, B. Sigurdsson, K. N. Mortensen, T. O. Lilius, and M. Nedergaard. Increased glymphatic influx is correlated with high EEG delta power and low heart rate in mice under anesthesia. *Science Adv.*, 5(2):eaav5447, 2019.
53. L. M. Hablitz, V. Plá, M. Giannetto, H. S. Vinitsky, F. F. Stæger, T. Metcalfe, R. Nguyen, A. Benrais, and M. Nedergaard. Circadian control of brain glymphatic and lymphatic fluid flow. *Nat. Commun.*, 11(1):1–11, 2020.
54. D. L. Mattson. Comparison of arterial blood pressure in different strains of mice. *Am. J. Hypertens.*, 14(5):405–408, 2001.
55. R. D. Penn and A. Linninger. The physics of hydrocephalus. *Pediatr. Neurosurg.*, 45(3):161–174, 2009.
56. G. Liu, H. Mestre, A. M. Sweeney, Q. Sun, P. Weikop, T. Du, and M. Nedergaard. Direct measurement of cerebrospinal fluid production in mice. *Cell Rep.*, 33(12):108524, 2020.
57. J. K. Karimy, K. T. Kahle, D. B. Kurland, E. Yu, V. Gerzanich, and J. M. Simard. A novel method to study cerebrospinal fluid dynamics in rats. *J. Neurosci. Meth.*, 241:78–84, 2015.
58. M. E. Pizzo, D. J. Wolak, N. N. Kumar, E. Brunette, C. L. Brunnquell, M.-J. Hannocks, N. J. Abbott, et al. Intrathecal antibody distribution in the rat brain: surface diffusion, perivascular transport and osmotic enhancement of delivery. *J. Physiol.*, 596(3):445–475, 2018.
59. H. Lee, K. Mortensen, S. Sanggaard, P. Koch, H. Brunner, B. Quistorff, M. Nedergaard, and H. Benveniste. Quantitative Gd-DOTA uptake from cerebrospinal fluid into rat brain using 3D VFA-SPGR at 9.4 T. *Magn. Reson. Med.*, 79(3):1568–1578, 2018.

60. L. Ray, J. J. Iliff, and J. J. Heys. Analysis of convective and diffusive transport in the brain interstitium. *Fluids Barriers CNS*, 16(1):6, 2019.
61. E. H. Stanton, N. D. Å. Persson, R. S. Gomolka, T. Lilius, B. Sigurdsson, H. Lee, A. L. R. Xavier, H. Benveniste, M. Nedergaard, and Y. Mori. Mapping of CSF transport using high spatiotemporal resolution dynamic contrast-enhanced MRI in mice: Effect of anesthesia. *Magn. Reson. Med.*, 85(6):3326–3342, 2021.
62. G. I. Taylor. Dispersion of soluble matter in solvent flowing slowly through a tube. *P. R. Soc. A*, 219:186–203, August 1953.
63. D. E. Troyetsky, J. Tithof, J. H. Thomas, and D. H. Kelley. Dispersion as a waste-clearance mechanism in flow through penetrating perivascular spaces in the brain. *Sci. Rep.*, 11:4595, 2021.
64. M. Asgari, D. de Zélicourt, , and V. Kurtcuoglu. Glymphatic solute transport does not require bulk flow. *Sci. Rep.*, pages 1–11, November 2016.
65. M. K. Sharp, R. O. Carare, and B. A. Martin. Dispersion in porous media in oscillatory flow between flat plates: applications to intrathecal, periarterial and paraarterial solute transport in the central nervous system. *Fluids Barriers CNS*, 16(1):13, 2019.
66. R. T. Kedarasetti, K. L. Turner, C. Echagarruga, B. J. Gluckman, P. J. Drew, and F. Costanzo. Functional hyperemia drives fluid exchange in the paravascular space. *Fluids Barriers CNS*, 17(1):1–25, 2020.
67. G. Halnes, K. H. Pettersen, L. Øyehaug, M. E. Rognes, and G. T. Einevoll. Astrocytic ion dynamics: Implications for potassium buffering and liquid flow. In *Computational Glioscience*, pages 363–391. Springer, 2019.

68. H. Mestre, L. M. Hablitz, A. L. R. Xavier, W. Feng, W. Zou, T. Pu, H. Monai, G. Murlidharan, R. M. Castellanos Rivera, M. J. Simon, et al. Aquaporin-4-dependent glymphatic solute transport in the rodent brain. *eLife*, 7:e40070, 2018.
69. A. J. Smith, X. Yao, J. A. Dix, B.-J. Jin, and A. S. Verkman. Test of the ‘glymphatic’ hypothesis demonstrates diffusive and aquaporin-4-independent solute transport in rodent brain parenchyma. *eLife*, 6:e27679, 2017.
70. A. Linninger, G. Hartung, S. Badr, and R. Morley. Mathematical synthesis of the cortical circulation for the whole mouse brain-part I. theory and image integration. *Comput. Biol. Med.*, 110:265–275, 2019.
71. C. Kirst, S. Skriabine, A. Vieites-Prado, T. Topilko, P. Bertin, G. Gerschenfeld, F. Verny, P. Topilko, N. Michalski, M. Tessier-Lavigne, et al. Mapping the fine-scale organization and plasticity of the brain vasculature. *Cell*, 180(4):780–795, 2020.
72. T. Miyawaki, S. Morikawa, E. A. Susaki, A. Nakashima, H. Takeuchi, S. Yamaguchi, H. R Ueda, and Y. Ikegaya. Visualization and molecular characterization of whole-brain vascular networks with capillary resolution. *Nat. Commun.*, 11(1):1–11, 2020.
73. T. M. Mathiisen, K. P. Lehre, N. C. Danbolt, and O. P. Ottersen. The perivascular astroglial sheath provides a complete covering of the brain microvessels: an electron microscopic 3D reconstruction. *Glia*, 58(9):1094–1103, 2010.
74. N. Korogod, C. C. H. Petersen, and G. W. Knott. Ultrastructural analysis of adult mouse neocortex comparing aldehyde perfusion with cryo fixation. *Elife*, 4:e05793, 2015.
75. F. M. White. *Viscous Fluid Flow*. McGraw-Hill, New York, 3rd edition, 2006.

76. J. Hommel, E. Coltman, and H. Class. Porosity–permeability relations for evolving pore space: a review with a focus on (bio-)geochemically altered porous media. *Transp. Porous Med.*, 124(2):589–629, 2018.

**Acknowledgments:** We thank Pablo Blinder for his constructive insights and for sharing vasculature data. We also thank Dan Xue for expert assistance with Fig. S4.

**Funding:**

NIH/National Institute of Aging grant no. RF1AG057575 (DHK, JHT, MN)

US Army Research Office grant MURI W911NF1910280 (DHK, JHT, MN)

Career Award at the Scientific Interface from Burroughs Wellcome Fund (JT)

**Author contributions:** Conceptualization: JT, KASB, PARB, JHT, DHK

Methodology: JT, KASB, PARB

Investigation: JT, KASB

Visualization: JT

Supervision: JHT, DHK

Writing—original draft: JT, KASB

Writing—review & editing: JT, KASB, PARB, JHT, DHK, MN

**Competing interests:** The authors declare that they have no competing interests.

**Data and materials availability:** Upon acceptance, all relevant data and codes will be posted in a publicly-available Github repository.



| Parameter                                                | Value                                                          | Reference   |
|----------------------------------------------------------|----------------------------------------------------------------|-------------|
| Pial artery segment length                               | 175 $\mu\text{m}$                                              | (29)        |
| Pial artery diameter                                     | 46 $\mu\text{m}$                                               | (14)        |
| Penetrating arteriole length ( $l_{\text{pen}}$ )        | 1000 $\mu\text{m}$                                             | (29)        |
| Penetrating arteriole diameter ( $d_{\text{pen}}$ )      | 11 $\mu\text{m}$                                               | (29)        |
| Precapillary effective length                            | 202 $\mu\text{m}$                                              | See B in SM |
| Precapillary diameter ( $d_{\text{precap}}$ )            | 6 $\mu\text{m}$                                                | (72)        |
| Pial area ratio ( $\Gamma_{\text{pial}}$ )               | 1.4                                                            | (14)        |
| Penetrating area ratio ( $\Gamma_{\text{pen}}$ )         | 0.7                                                            |             |
| Precapillary area ratio ( $\Gamma_{\text{precap}}$ )     | [0.07, 0.36]                                                   | (43, 44)    |
| Pial PVS permeability                                    | N/A (open space)                                               | (34)        |
| Pen. & precap. permeability ( $\kappa_{\text{PVS}}$ )    | [ $4.5 \times 10^{-15} \text{ m}^2$ , open]                    | (37)        |
| Parenchymal permeability ( $\kappa_{\text{par}}$ )       | [ $1.2 \times 10^{-17}$ , $4.5 \times 10^{-15}$ ] $\text{m}^2$ | (31, 37)    |
| Median arteriole-to-venule distance ( $l_{\text{a-v}}$ ) | 93 $\mu\text{m}$                                               | (30)        |
| Pial PVS shape                                           | Optimal elliptical annulus                                     | (35)        |
| Penetrating PVS shape                                    | Tangent eccentric annulus                                      | (35)        |
| Capillary PVS shape                                      | Concentric circular annulus                                    |             |
| Pre-capillaries per arteriole ( $n$ )                    | 11                                                             | (30)        |
| Dynamic viscosity                                        | $7 \times 10^{-4} \text{ Pa}\cdot\text{s}$                     |             |
| Endfoot wall thickness ( $T$ )                           | 0.45 $\mu\text{m}$                                             | (73)        |
| Endfoot gap width ( $g$ )                                | [20 nm, 5.1 $\mu\text{m}$ ]                                    | (73, 74)    |
| Endfoot gap cavity fraction ( $F_c$ )                    | [0.3%, 37%]                                                    | (73, 74)    |

**Table 1: Hydraulic network model parameters.** Plausible ranges for uncertain variables, which are tested in this article, are indicated in red.

|                                                         |                                                         |                                                         |
|---------------------------------------------------------|---------------------------------------------------------|---------------------------------------------------------|
|                                                         | $\kappa_{\text{par}} = 1.2 \times 10^{-17} \text{ m}^2$ | $\kappa_{\text{par}} = 4.5 \times 10^{-15} \text{ m}^2$ |
|                                                         | $g = 20 \text{ nm}$                                     | $g = 5.1 \mu\text{m}$                                   |
| $\kappa_{\text{PVS}} = 4.5 \times 10^{-15} \text{ m}^2$ | $R_{\text{max}}$                                        | Intermediate 2                                          |
| Open penetrating and precapillary PVSs                  | Intermediate 1                                          | $R_{\text{min}}$                                        |

**Table 2: The four different parametric scenarios tested in this article.** These four scenarios result from bracketing uncertain parameters related to PVS permeability (left column) and both parenchymal permeability and astrocyte endfoot gap size (top row).

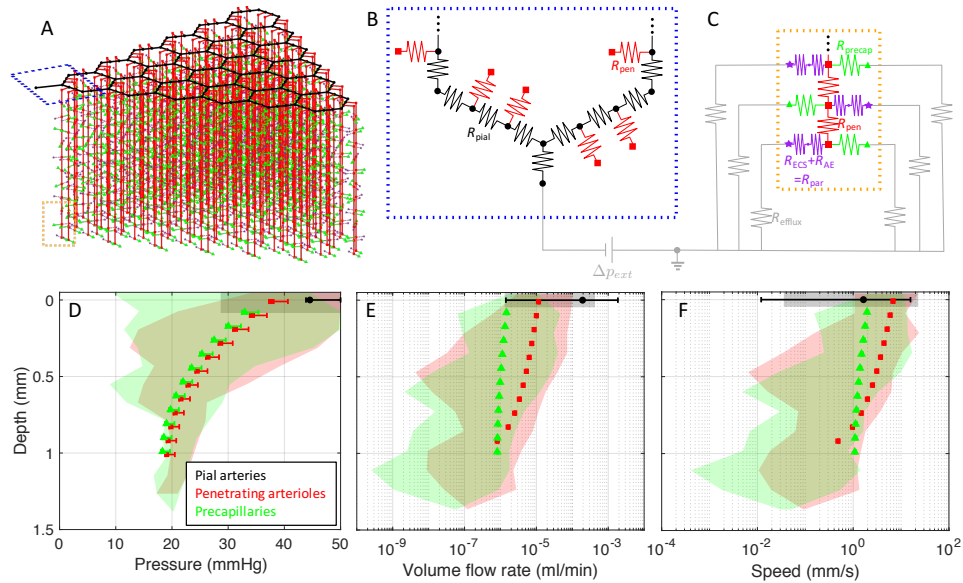

**Fig. 1: An idealized model of the cortical vasculature captures the salient features of blood flow, providing a validation of our approach.** (A) Diagram of the idealized vascular geometry, with colors indicating different vessel types. The blue and orange dotted lines show the regions that are enlarged in B-C. (B) Circuit schematic of the pial vasculature (black), which has several penetrating arterioles (red) branching from it. (C) Circuit schematic of a penetrating arteriole (red) which has a total of 11 precapillaries (green) branching from it (only 3 are shown). When we use a similar model to predict glymphatic CSF flow, we also include an equal number of parenchymal channels (purple). The gray circuit elements in B-C are not shown in A. (D-F) Pressure, volume flow rate, and speed for blood flow; in all three cases, the shaded regions indicate the range of values for a real vascular topology reported in Blinder et al. (30), while the symbols and error bars indicate the mean and range of values, respectively, computed using the idealized geometry shown in panel A.

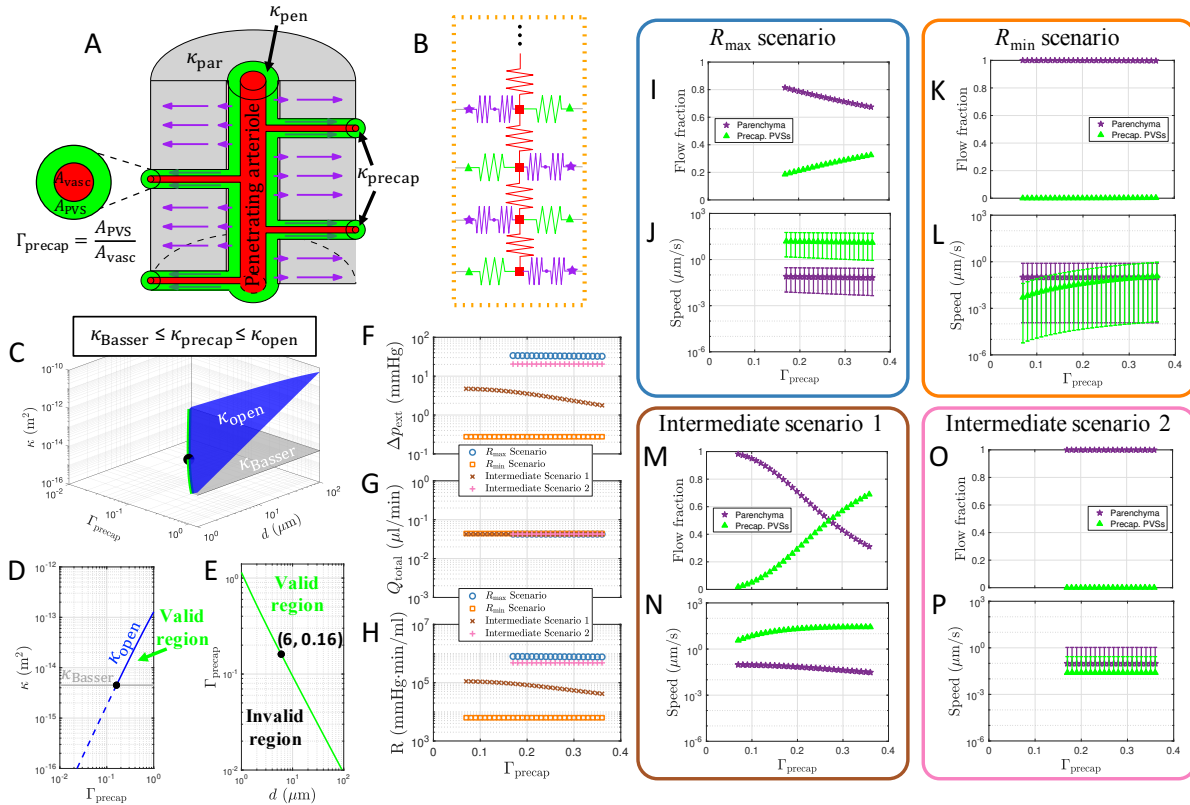

**Fig. 2: Simulations of CSF flow through the glymphatic network for different scenarios.** (A) Schematic illustrating the geometry of a penetrating PVS segment, with flow continuing through precapillary PVSs and/or the parenchyma. (B) Circuit schematic for the geometry shown in A. Throughout this article, CSF flows through the precapillary PVSs or parenchyma are consistently plotted with green or purple arrows/symbols, respectively. (C-E) Plots indicating the range of feasible values of permeability based on measurements performed by Basser (37) ( $\kappa_{\text{Basser}}$ ) and the equivalent permeability for an open (nonporous) PVS ( $\kappa_{\text{open}}$ ; see text). For  $d_{\text{precap}} = 6 \mu\text{m}$ , PVS sizes  $\Gamma_{\text{precap}} < 0.16$  are excluded for scenarios with  $\kappa_{\text{PVS}} = \kappa_{\text{Basser}}$  ( $R_{\text{max}}$  and Intermediate 2 scenarios). (F-H) The external pressure difference, total volumetric flow rate, and total hydraulic resistance for each of the four scenarios considered. (I-P) Flow fraction and flow speed through either precapillary PVSs or the parenchyma for the indicated scenarios. The symbols in panels J, L, N, and P indicate the mean flow speed across all space, while the error bars indicate the full range of values. The error bars that extend down to very low flow speeds in panels L and P arise due to negligibly small flow reaching deep into the cortex.

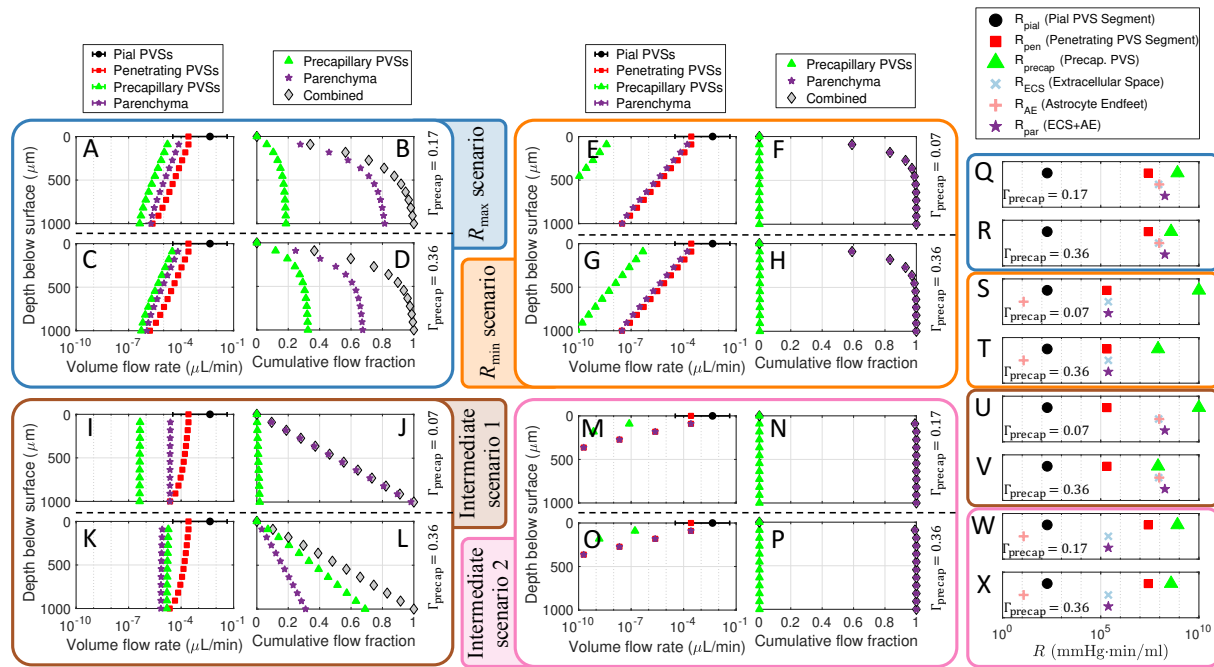

**Fig. 3: Cortical perfusion in different scenarios.** (A, C, E, G, I, K, M, O) The volume flow rate across the depth of the cortex, and (B, D, F, H, J, L, N, P) the cumulative flow fraction, defined as the fraction of total volume perfused from the surface of the brain to a given depth of the cortex, for the different indicated scenarios. The legends at the top apply to each corresponding column of plots. Note that panels E-F and I-J have small precapillary PVSs ( $\Gamma_{\text{precap}} = 0.07$ ), while panels C-D, G-H, K-L, and O-P have large precapillary PVSs ( $\Gamma_{\text{precap}} = 0.36$ ). Panels A-B and M-N have precapillary PVSs of intermediate sizes ( $\Gamma_{\text{precap}} = 0.17$ ) which satisfy  $\kappa_{\text{open}} \geq \kappa_{\text{Basser}}$ . (Q-X) Plots indicating the hydraulic resistance for a single segment of the network in each scenario, as indicated by the color of the bounding box and the  $\Gamma_{\text{precap}}$  label.

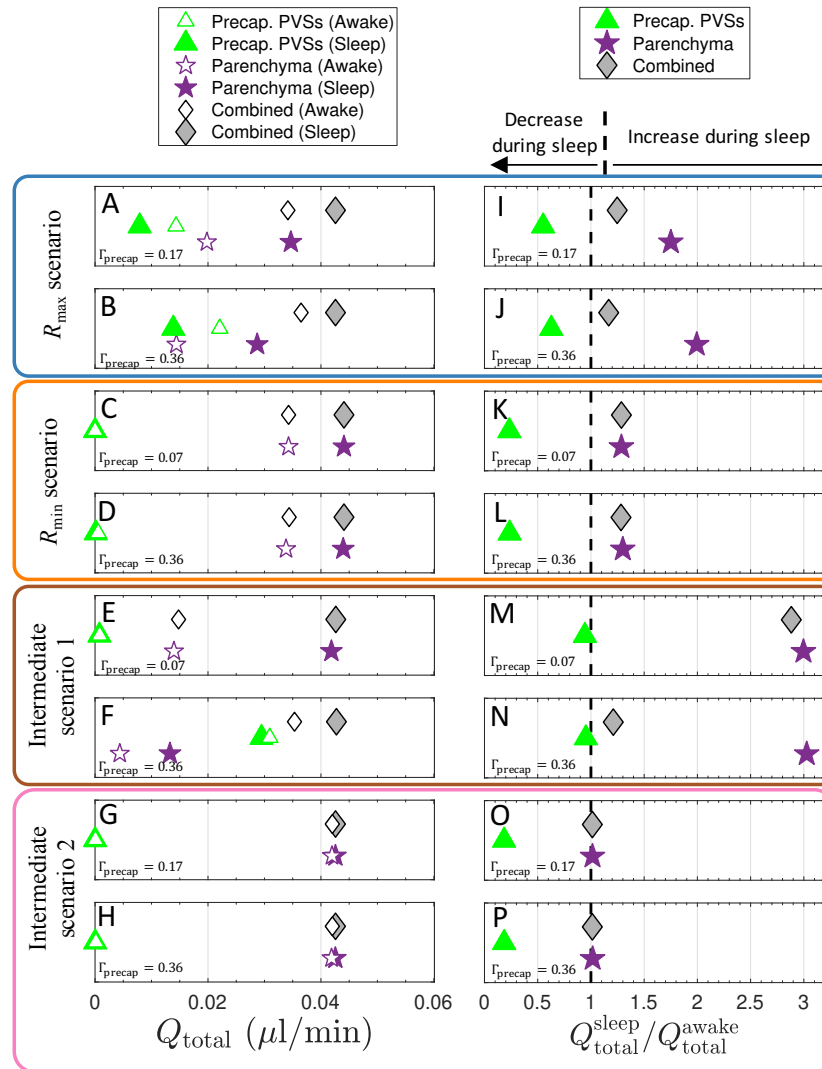

**Fig. 4: Modeled glymphatic flow in wakefulness and sleep.** (A-H) Volumetric flow rate  $Q_{\text{total}}$  summed over the entire network for different routes during either sleep or wakefulness, as indicated by the legend at the top; four different scenarios are considered, each with either small or large precapillary PVSs, as indicated. (I-P) The factor by which flow through precapillary PVSs, parenchyma, or both routes combined changes during sleep compared to wakefulness, quantified as  $Q_{\text{total}}^{\text{sleep}}/Q_{\text{total}}^{\text{awake}}$ , for the different indicated scenarios. The black dashed line corresponds to a value of 1, indicating no change; values to the right or left of this line correspond to an increase or a decrease, respectively, in the indicated volumetric flow rate during sleep. Note the different limiting precapillary PVS sizes  $\Gamma_{\text{precap}}$  indicated in the bottom left corner of each panel.

## Supplementary Material

### **A network model of glymphatic flow under different experimentally-motivated parametric scenarios**

Jeffrey Tithof, Kimberly A. S. Boster, Peter A. R. Bork, Maiken Nedergaard,  
John H. Thomas, Douglas H. Kelley

#### **A Lumped model of capillary bed and venous resistance for blood flow**

Blinder et al. (30) found that the resistance across nodes in the three-dimensional resistive network of the capillary bed asymptotes to a constant value with increasing distance between nodes. They found that the asymptotic resistance is numerically the same as a network with a resistance value of  $1.6 P/\mu\text{m}^3$  and that the average resistance for penetrating venules from the surface to the cortical depth layer of 4 was  $0.2 P/\mu\text{m}^3$ . Accordingly, we used a value of  $1.8 P/\mu\text{m}^3$  to represent the resistance to flow through the capillary bed and venous circulation back to the heart (to ground, in the circuit analogy), indicated by the gray  $R_{\text{efflux}}$  resistors in Fig. 1C. In this diagram, the green resistor represents the resistance to flow through a single precapillary segment, and the green symbols in Fig. 1D indicate the pressure at the distal end of that single precapillary segment.

## B Lumped model of capillary and venous PVS resistance for perivascular CSF flow

We modeled the resistance through the capillary PVSs based on the idea that the entire vascular capillary bed could be represented by a single equivalent resistor, as described by Blinder et al. (30). We first computed the effective precapillary length using Eqn. (1), with  $R = 0.4 \text{ Pa}\cdot\text{s}/\mu\text{m}^3$  and  $r = 2 \mu\text{m}$ , consistent with the values used by Blinder et al. We used the value we obtained ( $202 \mu\text{m}$ ) to calculate the equivalent perivascular resistance. This equivalent resistance,  $R_{\text{precap}}$ , represents the resistance to flow through the entire network of capillary PVSs beyond each given precapillary and is represented by each green resistor shown in Fig. 1C. The resistance to flow through the venous PVS,  $R_{\text{efflux}}$ , is assumed to be negligible and is arbitrarily set as  $R = 8 \times 10^{-8} \text{ P}/\mu\text{m}^3$  ( $R_{\text{efflux}}$  is represented by the gray resistors in Fig. 1C). It should be noted that this approach differs from the idealized vascular model, where  $R_{\text{precap}}$  represents flow through a single precapillary and  $R_{\text{efflux}}$  represents flow through the remainder of the capillary bed and the venous circulation.

## C Lumped model of parenchymal flow

The parenchyma was modeled as a porous medium with two-dimensional planar flow from penetrating arterioles to ascending veins. The total resistance to flow,  $R_{\text{par}}$ , was modeled as two resistors in series, representing the resistance to flow through the gaps in the astrocyte endfeet surrounding the penetrating arteriole,  $R_{\text{AE}}$ , and the resistance to flow through the surrounding extracellular space,  $R_{\text{ECS}}$ , so that  $R_{\text{par}} = R_{\text{AE}} + R_{\text{ECS}}$ . Estimates for the cavity fraction, end-foot gap width, and parenchymal permeability, which are used to calculate  $R_{\text{AE}}$  and  $R_{\text{ECS}}$  as described below, differ widely depending on the approach used to estimate them. Therefore, in order to bracket a reasonable range of expected flows, a high resistance (small cavity frac-

tion/endfeet gap and small permeability) and a low resistance (large cavity fraction/endfeet gap and high permeability) case are modeled based on a range of estimates from the literature.

The resistance to flow through the gaps in the endfeet was modeled as flow between infinite parallel plates, for which  $R = 12\mu T/g^3l$ , where  $T$  and  $g$  are the thickness (dimension parallel to flow) of the gap and gap width, respectively, as shown in Fig. S4. The length of the gap,  $l$ , was estimated by setting the area of the gap equal to the product of the cavity fraction of the gap and area of the penetrating arteriole segment through which CSF would flow, or  $lg = F_c\pi (d_{pen}\sqrt{\Gamma_{pen} + 1}) l_{pen}/n$ , where  $F_c$ ,  $d_{pen}$ ,  $\Gamma_{pen}$ ,  $l_{pen}$ , and  $n$  are the cavity fraction of the endfeet gaps, diameter of the penetrating arterioles, PVS-to-arteriole area ratio, length of the penetrating arterioles, and number of precapillaries per arteriole, respectively. Note that  $d_{pen}\sqrt{\Gamma_{pen} + 1}$  is equivalent to the diameter of the outer wall of the PVS. The resistance to flow through the endfeet gaps is then calculated as

$$R_{AE} = \frac{12\mu T}{g^2 F_c \pi (d_{pen} \sqrt{\Gamma_{pen} + 1}) (l_{pen}/n)}. \quad (2)$$

For the high resistance case, the endfoot gap and cavity fraction are assumed to be 20 nm and 0.3% based on electron microscopy measurements obtained by Mattisen et al. (73). Their measurements were obtained using tissue that was chemically fixed, which has been shown to significantly alter these dimensions (74). Nevertheless, their measurements have been used in other studies modeling the resistance to flow into the parenchyma and are included as an upper bound on the expected resistance. Korogod et al. (74) compared cryogenic and chemical fixation, and found significant differences in endfeet cavity fraction (37% vs 4%). For the low resistance case, we used the endfoot gap cavity fraction estimated from cryogenic fixation, 37%. Mathiisen et al. (73) estimated the cavity fraction they reported as  $F_c = gN/\pi d_{pen}$ , where  $N$  is the average number of transected endfoot gaps per vessel profile, which they reported as 2.5.



Since the density of endfeet gaps is unlikely to change with chemical fixation, we assumed the same relationship and used  $N = 2.5$  to estimate an endfoot gap width of  $5.1 \mu\text{m}$  for the low resistance case. In this case,  $R_{AE}$  was so small relative to  $R_{ECS}$  that it could be considered negligible (Fig. 3S, T, W, X), meaning that the endfeet resist flow far less than the parenchyma.

The resistance to flow through the extracellular space, modeled as flow between a point source with constant flux to a sink, was calculated as described by Holter et al. in their Supporting Information (31):

$$R_{ECS} = \frac{\mu \ln([1 - 2(l_{a-v}/d_{pen})]^2)}{2\pi\kappa_{par}(l_{pen}/n)}, \quad (3)$$

where  $R_{ECS}$  is the parenchymal resistance and  $l_{a-v}$  is the median distance between an arteriole and the nearest venule. The quantity  $l_{pen}/n$  indicates the length of the penetrating arteriole segment since the expression provided by Holter et al. was for a flux per unit length.

## D Equivalent permeability for flow through an open (non-porous) annulus

We modeled flow through the penetrating and precapillary PVSs using Darcy's law:

$$Q = -\frac{\kappa A_{PVS}}{\mu} \nabla p, \quad (4)$$

where  $Q$  is the volume flow rate,  $\kappa$  is the permeability,  $A_{PVS}$  is the PVS cross-sectional area,  $\mu$  is the dynamics viscosity, and  $p$  is the pressure. To calculate the upper bound in permeability, we considered the volume flow rate through a (non-porous) concentric circular annulus, given by Eqn. (3-51) in White (75):

$$Q = \frac{\pi}{8\mu} \left( -\frac{dp}{dz} \right) \left[ r_2^4 - r_1^4 - \frac{(r_2^2 - r_1^2)^2}{\ln(r_2/r_1)} \right], \quad (5)$$

where  $r_2$  is the radius of the outer circle (outer PVS wall) and  $r_1$  is the radius of the inner circle (blood vessel). Noting that  $A_{PVS} = \pi(r_2^2 - r_1^2)$ , setting Eqns. (4) and (5) equal, and then solving for  $\kappa$ , one obtains:

$$\kappa = \frac{1}{8} \left[ r_2^2 + r_1^2 - \frac{r_2^2 - r_1^2}{\ln(r_2/r_1)} \right]. \quad (6)$$

Hence, Eqn. (6) provides the upper bound for  $\kappa_{PVS}$  used throughout this article which is equivalent to modeling an open (non-porous) PVS.

## E Change in parenchymal permeability for wake versus sleep

The Kozeny-Carman equation is:

$$\kappa = \frac{\epsilon^3}{\tau(1 - \epsilon)^2 S^2}, \quad (7)$$

where  $\epsilon$  is the porosity,  $\tau$  is the tortuosity, and  $S$  is the specific surface area for a porous medium (76). Xie et al. (5) reported an increase of  $\epsilon$  from 0.14 during wakefulness to 0.23 during sleep, with no change in tortuosity. Assuming  $S$  remains approximately constant, this suggests  $\kappa_{\text{par}}^{\text{sleep}} / \kappa_{\text{par}}^{\text{wake}} = 5.5$ .

## Movie Captions

**Movie 1** An animation of the pressure, volume flow rate, and flow speed throughout the network for the  $R_{\text{max}}$  scenario. The top (bottom) row corresponds to small (large) precapillary PVSs with  $\Gamma_{\text{precap}} = 0.17$  ( $\Gamma_{\text{precap}} = 0.36$ ). The far left plot indicates the different node types, visualized at the same angle as the other six plots.

**Movie 2** An animation of the pressure, volume flow rate, and flow speed throughout the network for the  $R_{\text{min}}$  scenario. The top (bottom) row corresponds to small (large) precapillary PVSs with  $\Gamma_{\text{precap}} = 0.07$  ( $\Gamma_{\text{precap}} = 0.36$ ). The far left plot indicates the different node types,

visualized at the same angle as the other six plots.

**Movie 3** An animation of the pressure, volume flow rate, and flow speed throughout the network for Intermediate scenario 1. The top (bottom) row corresponds to small (large) precapillary PVSs with  $\Gamma_{\text{precap}} = 0.07$  ( $\Gamma_{\text{precap}} = 0.36$ ). The far left plot indicates the different node types, visualized at the same angle as the other six plots.

**Movie 4** An animation of the pressure, volume flow rate, and flow speed throughout the network for Intermediate scenario 2. The top (bottom) row corresponds to small (large) precapillary PVSs with  $\Gamma_{\text{precap}} = 0.17$  ( $\Gamma_{\text{precap}} = 0.36$ ). The far left plot indicates the different node types, visualized at the same angle as the other six plots.

| Scenario                                    | $R_{pen}$           | $R_{par}$           | $R_{precap}$        | $R_{offshoot}$      |
|---------------------------------------------|---------------------|---------------------|---------------------|---------------------|
| $R_{max}$ ( $\Gamma_{precap} = 0.17$ )      | $2.639 \times 10^7$ | $1.849 \times 10^8$ | $8.114 \times 10^8$ | $1.284 \times 10^8$ |
| $R_{max}$ ( $\Gamma_{precap} = 0.36$ )      | $2.639 \times 10^7$ | $1.849 \times 10^8$ | $3.832 \times 10^8$ | $1.229 \times 10^8$ |
| $R_{min}$ ( $\Gamma_{precap} = 0.07$ )      | $2.073 \times 10^5$ | $2.440 \times 10^5$ | $9.986 \times 10^9$ | $7.504 \times 10^5$ |
| $R_{min}$ ( $\Gamma_{precap} = 0.36$ )      | $2.073 \times 10^5$ | $2.440 \times 10^5$ | $8.320 \times 10^7$ | $7.501 \times 10^5$ |
| Intermediate 1 ( $\Gamma_{precap} = 0.07$ ) | $2.073 \times 10^5$ | $1.849 \times 10^8$ | $9.986 \times 10^9$ | $1.777 \times 10^7$ |
| Intermediate 1 ( $\Gamma_{precap} = 0.36$ ) | $2.073 \times 10^5$ | $1.849 \times 10^8$ | $8.320 \times 10^7$ | $6.462 \times 10^6$ |
| Intermediate 2 ( $\Gamma_{precap} = 0.17$ ) | $2.639 \times 10^7$ | $2.440 \times 10^5$ | $8.114 \times 10^8$ | $7.742 \times 10^7$ |
| Intermediate 2 ( $\Gamma_{precap} = 0.36$ ) | $2.639 \times 10^7$ | $2.440 \times 10^5$ | $3.832 \times 10^8$ | $7.742 \times 10^7$ |

**Table S1: Hydraulic resistances for different circuit elements in each of the eight scenarios.** The last column ( $R_{offshoot}$ ) corresponds to the entire lumped resistance for each pial offshoot, including all channels (penetrating and precapillary PVSs, parenchymal flow, and efflux) from the pial bifurcation leading to a penetrating PVS (i.e., points where the black channel bifurcates to a red channel in Fig. 1B) to ground). Units for all resistance values are mmHg·min/ml.

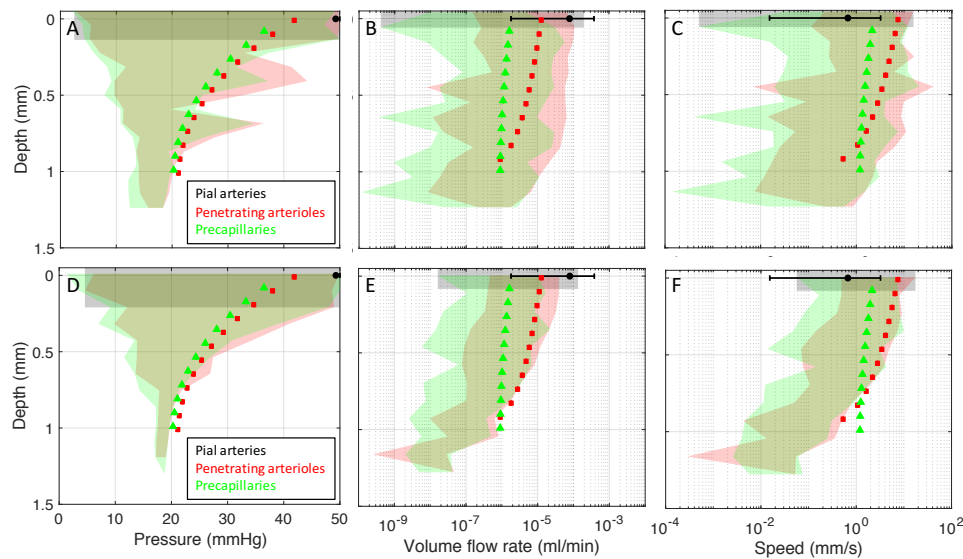

**Fig. S1: Comparisons of blood flow in the idealized model for two additional mice.** Plots of (A, D) pressure, (B, E) volume flow rate, and (C, F) speed for blood flow in two more mice (in addition to Fig. 1D-F). The shaded regions indicate the range of values for a real vascular topology reported by Blinder et al. (30), while the symbols and error bars indicate the mean and range of values, respectively, computed using the idealized geometry.

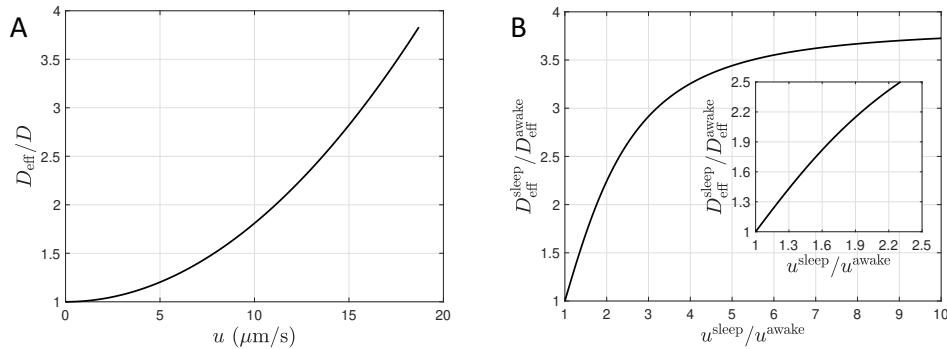

**Fig. S2: Sleep/awake dispersion coefficients for pial PVSs.** (A) The solute transport enhancement factor  $D_{\text{eff}}/D$  due to Taylor dispersion versus the mean flow speed  $u$ . Note that this calculation assumes the PVS shape is a concentric circular annulus with arterial diameter  $46 \mu\text{m}$  and  $\Gamma_{\text{pial}} = 1.4$ . For  $u = 18.7 \mu\text{m/s}$  (I4) and  $D = 1 \times 10^{-11} \text{ m}^2/\text{s}$ ,  $D_{\text{eff}}/D = 3.8$ . (B) The ratio of dispersion enhancement factors  $D_{\text{eff}}^{\text{sleep}}/D_{\text{eff}}^{\text{awake}}$  as a function of the sleep-to-awake flow speed ratio  $u^{\text{sleep}}/u^{\text{awake}}$ , where  $u^{\text{sleep}} = 18.7 \mu\text{m/s}$  (I4). The inset shows a magnified view for small values.

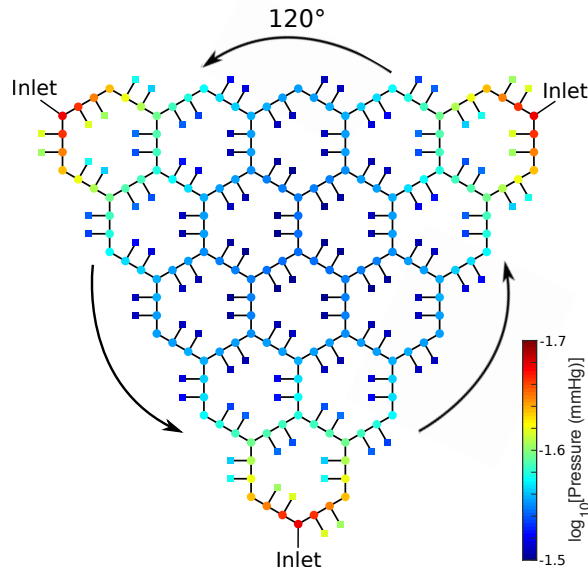

**Fig. S3: Additional model verification by testing rotational symmetry.** By implementing a total of three inlets (which is non-physiological), the hydraulic network model exhibits a  $120^\circ$  rotational symmetry. By comparing a rotated network to the original network, we determined that the computed pressure at each node satisfies rotational symmetry to within  $10^{-8}\%$ . Note that only pial nodes are plotted for the sake of clarity.

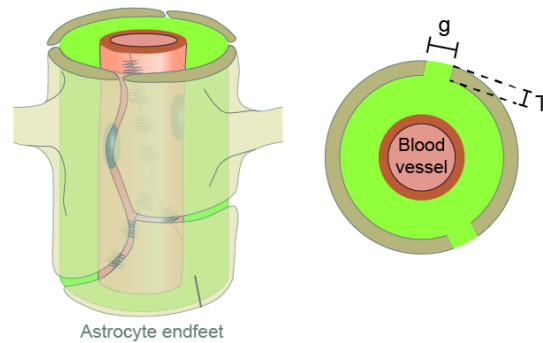

**Fig. S4: The geometry of the gaps between endfeet.** CSF leaves the perivascular space (green) surrounding penetrating arterioles (red) via gaps of width  $g$  and thickness  $T$ . The gaps between endfeet are long and narrow, as described by Wang et al. (28). To estimate the hydraulic resistance of the gaps, we consider flow between infinite parallel plates.
